# Supplementary material
Source: publisher site journal article supplement (https://www.dovepress.com/article/270441)
Supplement: Supplementary file 1 [file get_supplementary_file.php]

Supporting Materials for

“”

Changbing Wang1, 2,†, Yu Xia2, 3,† ,*, Shaochuan Huo5,†, Diwen Shou3, Qing Mei3, Wenjuan Tang3, Yinghua Li2 , Hongsheng Liu4, Yongjian Zhou3,*and Rong Zhou1,*

1 State Key Laboratory of Respiratory Disease, National Clinical Research Center for Respiratory Disease, Guangzhou Institute of Respiratory Health, First Affiliated Hospital of Guangzhou Medical University, Guangzhou Medical University, Guangzhou, 510230, China;

2 Central Laboratory, Guangzhou Institute of Pediatrics, Guangzhou Women and Children’s Medical Center, Guangzhou Medical University, Guangzhou, 510120, China

3 Department of Gastroenterology and Hepatology, Guangzhou Digestive Disease Center, Guangzhou First People’s Hospital, School of Medicine, South China University of Technology, Guangzhou 510180, China

4 Department of Radiology, Guangzhou Women and Children’s Medical Center, Guangzhou Medical University, Guangzhou, 510120, China

5 Department of Orthopedics, Shenzhen Hospital (Futian) of Guangzhou University of Chinese Medicine, Shenzhen, 518048, China

† These authors contributed equally to this work.

***** Correspondence: Yu Xia, Email: jnuxiayu@163.com; Yongjian Zhou, Email: eyzhouyongjian@scut.edu.cn; Rong Zhou, Email: [zhouronggird@sina.com](mailto:zhouronggird@sina.com)

Correspondence: Yu Xia

Department of Gastroenterology and Hepatology, Guangzhou Digestive Disease Center, Guangzhou First People’s Hospital, School of Medicine, South China University of Technology, Guangzhou 510180, China

Email: [jnuxiayu@163.com](mailto:jnuxiayu@163.com)

**Figure S1** The αvβ3 integrin expression in SKOV3 cells and HUVEC cells was analyzed by Western blot assay.

**Figure S1** (A) The uptake of R-Se@MEF2D-siRNA in SKOV3 cells was observed under a fluorescence microscope. (B) The uptake of R-Se@MEF2D-siRNA in SKOV3 cells pretreated with RGDfC was observed under a fluorescence microscope. Scale bars = 20 μm.
